# Supplementary material for: Cross-cultural adaptation and psychometric validation of a Chinese self-intermittent catheterization quality of life scale among patients with neurogenic bladder
Source: PeerJ. 2024 Oct 24;12:e18319. doi: 10.7717/peerj.18319 (PMC11512800; doi:10.7717/peerj.18319)
Supplement: Supplemental Information 1 [file peerj-12-18319-s001.xlsx]

## Sheet: Sheet1
note： 1.gender：1=male；2=female 2.residence：1=rural areas；2=city 3.marital status：1=unmarried；2=married；3=divorce；4=bereavement 4.educational background：1=Junior high school and below；2=High school；3=Junior college or above； 5.Care mode：1=live alone；2=spouse care；3=child care；4=parental care；5=sibling care 6.Length of illness：1=＜1 year；2=1~5 year；3= ≥5 year 7.Cause of illness：1=spinal cord injury；…
No.	gender	age	residence	marital status	education background	care mode	length of illness	cause of illness	Have you ever experienced any complications	item 1：YY1	item 2：YY2	item 3：YY3	item 4：YY4	item 5：YY5	item 6：YY6	item 7：YY7	item 8：YY8	item 9：BJ1	item 10：BJ2	item 11：BJ3	item 12：BJ4	item 13：YB1	item 14：YB2	item 15：YB3	item 16：YB4	item 17：YB5	item 18：YB6	item 19：XL1	item 20：XL2	item 21：XL3	item 22：XL4	item 23：XL5	item 24：XL6	Total score
1	1	35	1	2	3	3	3	4	2	0	2	2	2	1	2	2	1	0	1	1	1	0	0	2	2	2	2	1	2	2	1	2	1	32
2	1	49	1	2	3	4	2	2	1	2	4	3	2	2	2	4	3	1	2	1	2	2	4	2	4	3	4	1	1	2	1	1	2	55
3	1	53	2	1	3	2	3	1	1	0	2	0	1	2	1	0	2	2	2	4	2	0	2	1	0	2	1	1	2	2	1	2	2	34
4	1	45	1	2	2	1	2	6	2	3	3	2	2	2	2	3	2	1	1	1	1	2	4	4	4	4	4	1	2	2	2	1	2	55
5	1	42	2	2	3	1	2	5	1	2	1	0	2	2	0	2	0	2	2	0	2	4	3	3	4	3	4	4	4	3	3	3	4	57
6	1	42	2	1	3	2	1	2	1	0	2	0	1	1	1	1	1	1	1	1	1	0	1	1	0	0	1	1	2	2	0	0	0	19
7	1	52	1	2	2	5	1	1	2	2	4	3	4	2	4	3	2	2	1	1	2	4	3	2	4	2	4	3	3	2	4	4	4	69
8	1	57	1	2	2	3	1	1	1	2	0	1	1	2	0	1	0	2	1	2	2	4	3	4	4	3	3	1	2	1	2	1	1	43
9	1	46	2	2	2	2	2	2	2	1	2	2	0	0	1	0	1	3	2	2	2	2	1	0	1	2	0	4	3	3	2	2	2	38
10	1	40	1	2	2	1	3	1	1	2	0	1	2	0	2	1	0	1	0	0	0	2	1	1	0	1	2	3	2	3	2	2	2	30
11	1	21	1	3	3	2	1	6	2	2	1	0	2	1	1	2	0	0	0	1	0	1	2	2	2	1	0	2	2	2	2	1	2	29
12	1	21	2	2	3	1	2	2	2	2	2	1	0	1	0	2	2	0	2	0	2	0	0	1	0	1	2	2	0	1	0	2	0	23
13	1	26	1	2	3	2	1	2	1	2	4	4	3	2	3	4	3	4	4	3	4	2	4	3	2	3	4	4	4	3	2	3	4	78
14	1	27	1	2	2	4	2	7	2	1	1	0	0	0	0	1	0	2	1	2	1	3	2	2	2	3	2	2	1	2	2	1	2	33
15	1	28	1	2	2	2	3	1	1	4	3	3	4	2	4	3	3	2	1	2	2	3	3	2	3	4	4	3	4	4	3	4	2	72
16	1	31	2	2	3	2	2	4	1	2	4	2	3	4	4	3	4	1	1	1	1	2	4	2	4	2	4	1	1	2	1	2	2	57
17	1	32	1	1	3	1	3	7	1	2	3	2	2	3	4	3	2	4	3	3	4	4	4	3	2	3	3	4	4	4	4	4	4	78
18	1	35	2	2	2	1	1	1	1	4	3	4	3	2	4	3	3	2	1	2	1	2	3	3	4	3	4	1	1	1	2	2	2	60
19	1	26	1	2	3	2	2	2	1	0	0	1	1	1	2	2	0	2	1	2	2	2	3	4	2	2	4	4	2	2	2	2	2	45
20	1	33	2	3	3	3	1	2	2	0	1	2	1	0	0	1	0	2	2	2	2	4	4	2	3	3	4	3	4	2	3	2	2	49
21	1	23	2	2	1	1	2	1	1	0	2	1	0	1	1	0	2	4	2	2	3	3	3	3	3	4	4	3	2	3	3	4	3	56
22	1	37	1	2	1	2	3	7	2	2	2	2	1	1	1	0	1	2	2	2	4	4	3	2	4	3	4	3	2	2	2	2	2	53
23	1	22	1	1	3	1	1	6	2	1	0	2	1	1	0	2	1	2	3	3	2	4	4	4	4	2	4	1	1	1	1	1	1	46
24	1	29	1	2	3	2	2	2	1	4	4	2	3	2	2	3	2	4	3	4	4	2	3	3	3	4	3	2	4	4	3	2	3	73
25	1	35	1	1	3	2	3	1	1	4	3	4	2	3	3	3	4	3	2	2	2	3	4	3	2	3	3	2	3	4	4	4	3	73
26	1	24	2	2	1	2	2	5	2	3	3	3	2	4	3	4	3	4	3	2	3	3	4	2	4	3	4	3	4	4	3	3	3	77
27	1	24	2	2	2	1	3	1	1	3	4	4	2	3	2	3	2	2	4	4	4	3	3	3	3	2	3	3	4	3	4	3	4	75
28	1	24	2	3	1	5	1	1	1	3	4	3	4	4	3	3	4	3	4	2	4	4	4	3	4	3	4	4	4	3	4	3	3	84
29	1	24	2	2	3	5	1	1	2	2	3	4	2	3	2	4	2	4	3	4	3	3	3	3	3	3	4	2	4	4	3	4	3	75
30	1	24	1	2	1	1	2	2	1	2	4	4	2	4	4	4	2	2	3	2	2	3	3	3	3	2	4	2	3	4	2	2	2	68
31	1	24	1	2	1	2	2	1	2	3	3	4	4	3	2	3	3	3	4	4	3	2	3	4	3	4	4	2	3	3	3	4	3	77
32	2	24	2	1	3	3	1	6	1	3	4	2	2	3	4	4	2	2	2	3	2	2	3	3	3	2	3	2	3	3	4	4	3	68
33	2	24	2	2	2	1	3	1	1	4	4	3	2	4	2	3	4	3	3	3	3	4	4	4	4	2	3	4	4	4	3	3	3	80
34	2	24	1	1	1	2	2	4	1	4	3	4	4	3	2	4	4	3	4	4	4	4	3	2	2	3	4	2	3	4	3	4	3	80
35	2	24	1	2	1	2	3	7	1	3	3	3	3	4	4	3	2	4	2	2	3	4	4	4	2	2	4	3	3	3	2	4	3	74
36	2	24	2	2	1	2	2	2	1	3	3	4	2	4	4	3	4	4	3	3	3	3	2	3	2	2	3	3	2	4	3	4	4	75
37	2	24	2	2	3	1	1	1	1	4	4	3	2	3	3	4	3	4	4	4	4	3	4	4	2	4	2	3	3	3	2	4	3	79
38	1	24	2	3	1	2	3	9	2	3	3	4	4	4	2	3	2	4	3	4	3	2	3	2	3	4	3	4	3	4	4	4	4	79
39	2	24	1	2	3	2	2	1	2	4	4	4	3	4	2	3	4	2	2	4	3	3	3	3	2	2	2	3	3	4	3	4	3	74
40	1	24	2	1	1	2	2	1	1	3	3	2	3	4	4	4	3	3	3	3	4	4	3	3	3	2	4	4	3	4	3	4	3	79
41	2	24	1	2	2	4	1	6	2	4	3	2	4	4	3	3	4	4	3	4	3	3	3	2	4	4	3	4	3	4	4	4	3	82
42	2	24	1	2	3	2	3	2	1	3	3	4	3	4	4	3	4	4	3	4	4	2	3	2	3	3	3	4	3	2	3	2	3	76
43	1	24	2	2	1	1	2	1	2	3	4	2	4	4	4	4	3	4	3	4	3	2	2	4	2	3	3	3	3	4	4	3	4	79
44	2	30	2	1	3	1	3	2	1	3	4	4	3	4	3	3	3	3	3	3	3	4	3	2	3	4	4	4	4	4	4	4	3	82
45	2	24	1	2	1	2	3	1	2	4	3	3	2	3	3	3	4	4	3	3	4	3	2	3	2	2	3	3	3	3	4	4	3	74
46	2	24	1	2	3	3	1	4	1	3	3	4	4	2	4	3	2	3	4	4	3	3	4	3	4	2	3	2	4	4	4	3	3	78
47	1	32	2	2	3	2	3	5	2	2	4	2	4	3	3	3	3	3	3	4	3	4	4	4	3	4	4	4	3	3	4	2	3	79
48	2	25	2	3	3	2	3	1	1	4	3	4	4	2	2	3	3	3	4	3	3	4	3	3	4	3	3	4	3	4	4	4	3	80
49	2	25	1	2	3	1	2	2	2	3	4	4	4	4	2	3	2	4	2	2	3	4	3	3	2	2	3	4	3	4	3	4	3	75
50	1	25	2	1	3	4	1	9	1	4	4	3	2	2	3	3	3	3	4	2	4	3	4	4	4	3	4	2	3	3	4	3	3	77
51	2	25	1	2	3	2	3	2	1	2	0	0	0	1	2	1	2	1	2	1	1	3	3	2	2	2	2	4	3	4	4	3	3	48
52	1	25	2	1	3	1	2	1	1	3	3	3	4	4	4	4	2	4	3	4	4	3	4	2	2	3	2	2	3	3	2	4	3	75
53	2	25	2	2	3	2	3	2	2	2	3	4	4	4	4	4	3	4	3	3	3	3	3	3	4	4	3	4	3	4	4	3	3	82
54	2	25	1	2	3	2	3	1	1	4	3	4	2	4	2	3	3	3	4	3	3	4	4	4	2	2	3	3	3	4	3	3	4	77
55	1	25	2	2	3	3	1	1	2	4	2	3	2	2	2	2	2	4	4	4	4	3	4	4	3	2	4	2	3	4	2	2	4	72
56	1	25	1	2	3	2	3	7	2	3	3	4	4	3	2	3	2	3	3	3	3	2	2	2	4	4	3	4	4	3	4	3	4	75
57	1	25	2	2	3	2	2	1	2	3	4	2	3	2	2	4	3	4	4	3	3	4	4	4	4	4	4	4	3	4	2	2	3	79
58	1	25	2	2	3	1	3	2	2	3	3	2	3	3	2	4	2	4	4	3	3	3	2	3	2	3	3	3	3	4	3	3	3	71
59	1	25	1	1	3	2	1	1	1	3	3	3	4	3	4	3	4	3	4	2	3	4	3	3	4	3	3	3	4	3	4	2	4	79
60	1	32	2	2	3	2	3	1	1	3	4	3	2	3	3	3	2	4	4	3	3	3	2	3	2	4	3	4	3	2	4	3	3	73
61	2	48	1	2	1	5	3	4	1	4	4	2	2	3	3	4	3	4	4	3	4	4	2	2	2	3	2	4	4	3	3	3	3	75
62	1	36	2	2	1	1	3	1	2	3	2	4	3	4	4	4	2	3	3	3	4	4	3	2	4	3	3	3	2	3	4	4	3	77
63	1	21	2	1	3	2	1	8	1	4	3	4	3	3	2	4	2	4	4	4	3	2	3	3	3	2	3	4	4	3	3	3	4	77
64	2	38	1	2	3	2	2	2	2	4	3	3	3	4	3	3	4	4	3	3	3	3	3	3	2	4	3	4	4	4	3	4	3	80
65	1	55	2	4	3	4	3	6	2	3	4	4	3	2	4	3	3	3	2	2	2	3	2	4	2	3	3	4	4	3	4	2	3	72
66	1	52	2	2	3	2	3	1	1	3	4	3	3	4	3	4	2	3	2	3	2	2	2	4	3	4	3	3	4	4	3	2	4	74
67	2	54	1	2	1	1	1	2	2	4	4	4	2	3	3	3	4	4	4	4	3	3	3	4	2	4	3	3	4	2	4	2	3	79
68	1	21	2	2	1	2	3	1	1	3	4	4	3	2	4	4	4	4	3	3	3	4	4	2	4	3	3	3	3	3	4	3	3	80
69	1	31	1	2	3	2	1	2	1	2	4	4	4	4	4	3	4	3	3	4	3	3	2	2	3	3	4	4	4	4	3	3	3	80
70	2	37	1	2	2	1	3	5	1	3	4	2	3	3	4	4	2	3	3	2	3	4	4	2	2	2	3	3	2	2	4	4	3	71
71	1	40	2	2	3	2	2	7	2	3	4	2	2	3	3	3	3	3	3	2	2	2	2	2	2	3	4	4	4	3	3	4	3	69
72	1	53	1	4	2	2	3	1	1	4	3	3	2	4	2	3	3	4	2	2	3	4	4	2	4	4	3	4	4	3	3	3	4	77
73	1	56	2	2	1	3	2	4	2	4	3	3	2	3	2	4	4	4	4	4	3	4	2	2	3	3	4	2	4	3	3	2	4	76
74	1	45	1	1	2	2	3	1	1	4	3	3	3	2	2	4	2	4	2	2	2	2	4	3	4	3	3	3	2	3	4	2	3	69
75	1	37	1	2	3	2	3	1	1	3	3	4	3	4	3	4	4	3	2	3	4	3	3	2	3	3	4	4	4	3	4	3	3	79
76	2	30	2	1	2	4	1	3	2	3	3	3	4	4	3	3	4	3	4	2	3	4	3	4	3	4	3	4	4	3	3	2	3	79
77	1	43	2	2	2	2	2	2	1	4	3	4	2	2	3	3	3	4	3	3	3	3	3	3	2	4	3	3	4	2	3	4	4	75
78	2	55	1	2	2	2	1	1	1	3	3	4	2	4	2	4	4	4	4	3	4	4	4	4	4	4	3	3	3	4	4	3	3	84
79	1	29	1	2	3	1	2	2	2	2	4	4	3	4	3	3	3	4	3	4	3	3	4	3	4	4	4	2	4	2	3	3	2	78
80	2	24	2	1	2	1	3	6	1	4	4	2	4	3	3	4	2	4	2	2	4	4	2	3	4	4	3	4	2	3	3	2	2	74
81	1	39	1	2	2	2	2	1	2	4	3	3	3	2	2	3	2	3	3	3	3	3	4	2	2	3	4	4	3	3	2	2	4	70
82	2	42	2	2	3	2	3	1	1	3	3	2	3	4	4	4	2	4	4	2	3	4	2	3	3	2	4	3	3	4	2	3	3	74
83	1	45	1	2	3	1	2	2	2	2	2	0	2	1	1	1	1	2	2	2	2	2	2	1	0	1	2	4	2	3	4	2	3	44
84	2	37	1	2	2	2	1	1	1	1	2	0	1	2	2	0	1	1	2	1	1	2	2	1	2	2	0	2	2	3	2	2	4	38
85	2	55	1	4	3	2	3	4	2	4	3	2	2	4	3	3	2	3	4	4	3	4	2	4	2	2	4	3	4	4	4	2	3	75
86	2	21	2	2	2	1	2	3	1	0	2	2	1	1	2	2	2	1	2	2	2	1	2	0	2	1	1	4	2	3	3	2	4	44
87	1	56	1	2	3	2	2	2	2	3	4	2	4	2	2	3	4	1	1	1	2	0	0	0	2	0	2	2	4	4	4	2	4	53
88	1	46	2	2	3	2	2	1	2	3	3	3	4	4	3	4	4	4	3	2	3	4	2	4	2	2	4	3	2	4	2	4	3	76
89	2	30	2	2	3	4	3	8	1	3	4	2	2	3	2	3	4	3	3	3	2	4	2	4	4	4	4	3	4	4	3	3	4	77
90	1	32	1	1	2	1	1	2	2	4	3	4	4	3	4	3	3	4	3	4	4	4	2	2	4	2	4	4	4	2	3	2	3	79
91	2	40	2	2	3	2	3	1	1	4	3	2	3	2	3	4	3	3	2	3	2	3	2	4	4	3	3	0	1	2	2	1	0	59
92	1	36	1	1	1	1	3	2	1	2	2	3	2	4	2	4	3	3	4	3	3	1	1	0	2	0	1	3	2	3	2	4	4	58
93	2	34	1	2	3	5	2	2	2	3	2	2	3	3	4	4	2	3	3	3	4	1	2	2	1	2	0	1	0	2	0	2	2	51
94	2	56	2	2	2	3	3	6	1	3	4	2	2	4	4	3	4	4	4	4	3	2	1	2	1	1	2	2	4	3	4	4	4	71
95	1	49	2	2	3	2	2	1	1	4	3	4	4	3	4	4	2	4	2	4	4	3	3	4	4	3	4	3	4	3	4	4	3	84
96	1	37	1	2	2	2	1	1	2	2	3	4	3	4	2	4	4	2	3	3	2	2	2	0	1	0	2	3	3	4	4	3	3	63
97	2	39	2	1	1	1	2	4	2	4	3	4	3	4	2	4	4	4	3	4	3	3	3	2	4	2	4	4	2	2	2	3	4	77
98	1	39	2	2	2	2	3	9	1	4	3	3	2	3	3	4	4	4	3	2	3	0	0	1	0	0	0	3	3	2	4	4	3	58
99	1	42	1	2	2	1	2	2	2	2	4	3	4	2	4	3	3	3	2	2	3	3	4	4	4	2	3	3	3	4	3	3	3	74
100	1	44	2	4	2	2	3	1	2	4	4	3	2	4	3	4	4	4	3	2	2	0	2	2	2	1	1	0	0	1	1	0	1	50
101	2	44	1	2	3	4	1	3	1	4	3	2	3	4	2	4	3	3	2	3	4	0	2	1	2	0	0	3	3	2	2	3	4	59
102	2	49	1	2	3	2	2	5	2	4	4	3	4	3	4	3	4	3	2	3	4	3	3	2	3	3	3	2	2	4	2	3	4	75
103	2	33	2	2	1	2	3	1	1	2	3	4	2	4	4	3	3	4	2	2	3	2	1	2	2	1	0	2	2	2	3	4	4	61
104	2	23	1	2	2	2	2	2	2	3	4	2	4	3	3	4	3	4	4	2	3	4	2	3	2	2	3	4	4	4	2	4	3	76
105	2	22	2	2	3	2	1	1	1	2	4	3	2	4	3	3	2	4	3	4	3	4	2	3	2	3	3	3	4	3	4	3	3	74
106	1	57	1	2	1	1	3	8	2	4	3	4	4	4	2	4	2	4	3	3	4	1	2	1	2	0	1	3	2	4	3	2	4	66
107	1	40	2	1	3	2	2	1	2	2	4	3	3	3	4	4	3	3	3	3	3	3	3	3	2	2	4	4	4	3	4	4	3	77
108	1	30	2	2	3	1	3	5	1	3	3	3	3	2	3	3	2	3	3	2	4	3	3	2	2	4	3	3	3	3	4	2	4	70
109	1	35	2	2	3	2	2	4	1	3	3	3	4	2	2	2	2	4	4	4	3	0	0	1	0	2	1	4	4	2	2	4	3	59
110	1	42	1	1	2	2	1	2	2	3	4	4	4	2	3	3	4	2	3	4	3	3	4	4	2	3	4	4	2	3	2	2	4	76
111	2	43	2	1	3	3	3	1	2	3	3	3	3	2	3	2	2	4	4	2	4	3	3	3	2	3	3	3	3	3	4	3	3	71
112	1	36	2	2	1	2	2	1	1	3	4	3	3	2	2	4	3	2	4	2	4	2	1	0	1	1	0	4	3	4	4	3	3	62
113	2	52	1	1	2	2	3	3	1	2	2	3	4	4	3	3	3	4	2	4	3	4	4	4	4	3	4	4	2	2	2	3	4	77
114	1	45	2	2	3	2	1	1	2	3	3	4	4	2	4	4	4	3	4	3	4	4	2	4	4	3	3	3	3	3	2	4	4	81
115	1	30	1	2	1	1	2	1	1	2	4	4	4	2	3	3	4	4	2	2	2	4	4	4	3	3	2	4	2	2	2	3	2	71
116	1	33	2	2	3	2	3	6	2	3	4	4	2	2	4	4	4	4	4	3	3	3	3	2	3	3	4	3	3	4	4	3	4	80
117	1	52	1	2	2	4	3	2	2	2	3	2	3	2	2	3	3	2	2	4	2	2	0	2	1	0	2	1	2	0	1	1	0	42
118	1	56	2	2	2	2	3	1	1	4	3	4	3	4	4	3	3	4	2	4	4	2	2	1	1	2	0	2	4	3	3	4	3	69
119	2	38	2	1	2	2	1	1	2	1	2	1	2	2	0	0	2	2	2	3	4	4	3	3	4	3	4	2	3	3	3	2	3	58
120	2	42	2	2	3	1	3	1	1	2	1	2	2	2	1	0	2	3	4	2	4	2	0	1	2	1	2	4	4	4	3	3	4	55
121	2	38	2	1	3	4	2	4	2	4	3	4	2	4	4	4	2	3	3	3	3	4	4	4	2	4	4	3	3	4	4	3	3	81
122	1	24	1	2	2	2	3	7	2	3	4	2	3	2	4	3	4	1	0	1	2	0	2	1	0	1	1	3	2	3	2	2	4	50
123	1	23	1	2	1	1	1	1	1	0	0	0	1	0	0	0	1	1	0	1	2	0	0	2	1	2	2	0	1	0	0	1	2	17
124	2	57	2	2	3	2	3	1	2	2	2	1	2	0	0	0	1	3	4	3	3	4	4	4	4	4	3	0	0	0	1	0	1	46
125	1	41	1	1	2	4	2	2	2	0	1	1	2	1	0	2	0	2	2	2	2	0	1	2	0	2	0	2	2	3	3	2	2	34
126	1	37	1	2	3	2	3	5	1	4	3	2	2	2	4	3	4	0	1	0	2	0	2	1	2	0	2	0	2	0	2	2	0	40
127	1	37	1	2	2	2	3	6	2	1	2	0	1	0	1	1	0	4	3	3	4	1	2	0	1	2	0	1	2	0	2	2	2	35
128	2	31	2	1	3	3	1	1	2	3	2	3	2	2	2	3	2	0	1	0	0	1	1	0	2	1	1	1	2	2	0	0	1	32
129	2	39	2	2	2	1	3	1	2	2	1	0	0	1	1	2	0	3	2	2	2	3	3	4	3	3	4	3	2	4	2	3	4	54
130	2	28	2	1	2	2	3	8	1	1	1	1	2	1	2	2	2	1	2	1	0	1	0	2	1	0	2	0	1	0	0	0	2	25
131	1	43	2	2	2	1	2	3	1	4	4	4	2	3	3	4	2	2	2	2	2	2	0	0	1	2	2	3	2	4	4	4	3	61
132	1	56	1	1	2	2	2	1	2	1	2	1	0	1	0	1	2	2	4	2	2	1	2	0	0	1	1	0	2	1	0	0	0	26
133	1	31	2	2	2	2	3	4	2	3	4	3	2	4	2	4	4	0	0	1	2	1	0	1	2	2	2	2	3	2	2	2	4	52
134	2	32	2	2	3	2	1	1	1	3	4	3	2	4	4	3	3	4	2	3	4	2	0	2	1	1	2	4	2	2	4	3	4	66
135	1	53	1	1	1	1	3	7	2	2	0	1	1	2	0	2	1	1	2	2	2	1	2	1	0	1	0	2	3	3	2	2	2	35
136	2	30	2	2	3	1	1	1	1	2	1	0	1	2	2	0	1	4	4	3	3	3	2	2	2	2	4	4	4	4	4	4	4	62
137	1	26	1	1	3	4	3	4	2	3	4	3	3	3	3	4	2	3	4	3	3	4	3	3	3	2	4	2	3	3	4	3	4	76
138	1	46	2	2	3	2	3	1	2	2	0	2	0	0	1	2	0	3	3	2	4	4	4	4	3	2	3	4	4	4	4	4	3	62
139	1	52	1	2	3	2	3	1	1	0	1	1	0	0	0	2	1	4	3	4	4	1	0	1	0	1	2	1	0	2	0	1	1	30
140	1	43	2	1	3	4	2	1	2	1	2	0	1	1	1	0	1	2	4	4	3	4	3	3	4	4	4	2	2	3	2	2	4	57
141	2	38	2	2	3	2	3	4	1	1	1	1	2	2	1	2	0	2	2	3	2	3	4	2	3	3	3	3	3	2	2	2	3	52
142	1	28	2	1	1	1	3	9	2	1	0	0	0	2	0	1	1	1	1	0	2	1	2	2	1	0	0	0	2	0	2	0	0	19
143	1	36	2	2	3	2	1	1	2	0	2	2	0	0	0	0	1	0	2	1	0	1	1	2	1	0	0	1	0	0	1	1	1	17
144	1	38	2	1	3	2	3	5	1	4	3	3	2	3	4	3	3	4	2	3	4	3	4	4	4	4	4	2	2	3	2	2	4	76
145	1	48	1	2	2	5	2	1	2	4	3	4	3	4	3	3	2	1	1	2	1	0	1	2	2	2	0	2	2	4	2	4	4	56
146	2	31	2	1	3	2	3	3	1	3	4	2	2	3	3	3	3	3	4	3	4	3	2	4	4	4	3	3	2	2	2	4	4	74
147	1	25	2	2	1	1	2	5	1	3	4	3	2	2	3	4	3	3	3	3	3	1	1	0	0	2	1	2	2	4	3	2	4	58
148	1	51	1	1	3	1	1	1	2	2	2	1	2	2	2	2	0	3	3	3	4	4	4	3	3	3	4	3	4	2	3	4	3	66
149	1	33	2	2	2	4	2	7	1	0	0	0	1	1	1	0	2	4	3	3	4	0	0	2	2	1	2	2	2	3	3	3	4	43
